# Supplementary material for: Comorbidity, Radiation Duration, and Pretreatment Body Muscle Mass Predict Early Treatment Failure in Taiwanese Patients with Locally Advanced Oral Cavity Squamous Cell Carcinoma after Completion of Adjuvant Concurrent Chemoradiotherapy
Source: MDPI journal article supplement (doi:10.3390/diagnostics11071203), 2021-07-02
Supplement: s1 [file s1]

**Supplementary Table S1.** Clinicopathologic features of 21 oral cavity cancer patients with early treatment failure

| Case | Age | TNM stage, site             | Hist. grade | PS | HN-CCl <sup>b</sup> | Smoking | Alcohol | Betel nut | LBMI <sup>c</sup> | ASMI <sup>d</sup> | Radiotherapy  | Cisplatin dose <sup>e</sup> | Failure pattern | Time to treatment failure (months) |
|------|-----|-----------------------------|-------------|----|---------------------|---------|---------|-----------|-------------------|-------------------|---------------|-----------------------------|-----------------|------------------------------------|
| 1    | 58  | T4aN0M0, IVA tongue         | 3           | 2  | 0                   | No      | No      | No        | 13.7              | 4.99              | 62 Gy, 31 frx | 240                         | PD              | 3.03                               |
| 2    | 49  | T4aN0M0, IVA mouth floor    | 3           | 2  | 0                   | Yes     | Yes     | Yes       | 13.9              | 5.88              | 66 Gy, 33 frx | 180                         | PD              | 2.50                               |
| 3    | 65  | T4aN0M0, IVA tongue         | 2           | 2  | 1                   | Yes     | Yes     | Yes       | 13.9              | 5.17              | 56 Gy, 28 frx | 240                         | PD              | 4.57                               |
| 4    | 54  | T4aN0M0, IVA buccal mucosa  | 3           | 1  | 0                   | Yes     | Yes     | Yes       | 14.0              | 5.25              | 60 Gy, 30 frx | 300                         | PD              | 5.97                               |
| 5    | 39  | T4aN2bM0, IVA buccal mucosa | 2           | 2  | 0                   | Yes     | Yes     | Yes       | 12.1              | 5.53              | 62 Gy, 31 frx | 240                         | PD              | 3.63                               |
| 6    | 51  | T4aN2cM0, IVA tongue        | 3           | 1  | 0                   | Yes     | Yes     | Yes       | 15.5              | 7.04              | 66 Gy, 33 frx | 240                         | CD              | 0.87                               |
| 7    | 61  | T4aN2cM0, IVA buccal mucosa | 2           | 1  | 1                   | Yes     | Yes     | Yes       | 15.0              | 6.09              | 62 Gy, 31 frx | 160                         | NCD (sepsis)    | 3.57                               |
| 8    | 61  | T3N1M, III buccal mucosa    | 2           | 1  | 1                   | Yes     | Yes     | Yes       | 17.8              | 7.74              | 60 Gy, 30 frx | 240                         | PD              | 3.73                               |
| 9    | 49  | T3N0M, III gingiva          | 3           | 1  | 0                   | Yes     | Yes     | No        | 14.8              | 5.45              | 64 Gy, 32 frx | 240                         | CD              | 2.20                               |
| 10   | 53  | T4aN1M0, IVA buccal mucosa  | 2           | 1  | 0                   | Yes     | Yes     | Yes       | 13.3              | 5.37              | 64 Gy, 32 frx | 240                         | CD              | 0.76                               |
| 11   | 47  | T4aN2cM0, IVA tongue        | 3           | 1  | 0                   | Yes     | Yes     | Yes       | 16.5              | 7.20              | 66 Gy, 33 frx | 280                         | PD              | 4.83                               |
| 12   | 67  | T4aN2cM0, IVA buccal mucosa | 3           | 1  | 1                   | No      | Yes     | No        | 15.8              | 6.02              | 66 Gy, 33 frx | 240                         | PD              | 4.07                               |
| 13   | 44  | T4aN2cM0, IVA gingiva       | 3           | 1  | 0                   | Yes     | Yes     | Yes       | 16.5              | 7.33              | 64 Gy, 32 frx | 240                         | PD              | 5.93                               |
| 14   | 65  | T4aN1M0, IVA tongue         | 2           | 2  | 1                   | Yes     | Yes     | Yes       | 13.8              | 5.37              | 64 Gy, 36 frx | 280                         | PD              | 4.23                               |
| 15   | 56  | T4bN2bM0, IVB buccal mucosa | 1           | 1  | 0                   | Yes     | Yes     | Yes       | 16.7              | 6.88              | 72 Gy, 36 frx | 240                         | CD              | 1.03                               |

|    |    |                                |   |   |   |     |     |     |       |      |               |     |                 |      |
|----|----|--------------------------------|---|---|---|-----|-----|-----|-------|------|---------------|-----|-----------------|------|
| 16 | 56 | T4bN2bM0, IVB<br>buccal mucosa | 3 | 1 | 0 | Yes | Yes | Yes | 15.9  | 7.09 | 66 Gy, 33 frx | 240 | PD              | 5.23 |
| 17 | 49 | T4aN3M0, IVB<br>buccal mucosa  | 3 | 0 | 0 | Yes | Yes | Yes | 15.3  | 6.75 | 72 Gy, 36 frx | 240 | PD              | 4.63 |
| 18 | 41 | T3N2bM0, IVA<br>buccal mucosa  | 3 | 1 | 1 | Yes | Yes | Yes | 16.9  | 8.01 | 66 Gy, 33 frx | 240 | PD              | 4.03 |
| 19 | 49 | T3N3M0, IVB<br>tongue          | 2 | 1 | 1 | Yes | Yes | Yes | 14.0  | 5.46 | 66 Gy, 33 frx | 240 | PD              | 3.27 |
| 20 | 59 | T4aN1M0, IVA<br>tongue         | 2 | 1 | 1 | Yes | No  | Yes | 14.4  | 5.89 | 66 Gy, 33 frx | 240 | NCD<br>(sepsis) | 1.23 |
| 21 | 43 | T4aN2aM0, IVA<br>tongue        | 2 | 1 | 0 | Yes | No  | Yes | 13.74 | 4.25 | 64 Gy, 32 frx | 240 | PD              | 5.20 |

PS, Eastern Cooperative Oncology Group performance status; HN-CCI, head and neck Charlson Comorbidity Index; LBMI, lean body mass index; ASMI, appendicular skeletal muscle index; frx, fraction; Time to treatment failure, the time period to develop treatment failure after CCRT ends; PD, disease in progression; CD, cancer death; NCD, non-cancer death

<sup>a</sup>Histological grade <sup>b</sup>0, no comorbidity; 1, having comorbidity      <sup>c</sup>unit, kg/m<sup>2</sup>      <sup>d</sup>unit, kg/m<sup>2</sup>      <sup>e</sup>unit, mg/m<sup>2</sup>
