# Supplementary material for: Comorbidity, Radiation Duration, and Pretreatment Body Muscle Mass Predict Early Treatment Failure in Taiwanese Patients with Locally Advanced Oral Cavity Squamous Cell Carcinoma after Completion of Adjuvant Concurrent Chemoradiotherapy
Source: MDPI journal article supplement (doi:10.3390/diagnostics11071203), 2021-07-02
Supplement: s1 [file s1]

**Table S3.** The characteristic between patients with complete CCRT and incomplete CCRT/data collection in 85 oral cavity cancer patients following curative surgery

| Variables, expressed as Numbers (%) or mean $\pm$ SD           | CCRT completion                             |                                          | <i>P</i> -value |
|----------------------------------------------------------------|---------------------------------------------|------------------------------------------|-----------------|
|                                                                | Yes                                         | No                                       |                 |
| <b><i>Patient number</i></b>                                   | 69 (100)                                    | 16 (100.0)                               |                 |
| <b><i>Clinicopathologic</i></b>                                |                                             |                                          |                 |
| Age (years)                                                    | 53.2 $\pm$ 8.4                              | 57.69 $\pm$ 10.9                         | 0.077           |
| Tumor location                                                 |                                             |                                          | 0.812           |
| Buccal mucosa                                                  | 20 (29.0)                                   | 4 (25.0)                                 |                 |
| Tongue                                                         | 28 (40.6)                                   | 7 (43.8)                                 |                 |
| Gingiva                                                        | 13 (18.8)                                   | 2 (12.5)                                 |                 |
| Mouth floor                                                    | 3 (4.3)                                     | 2 (12.5)                                 |                 |
| Retromolar                                                     | 2 (2.9)                                     | 0 (0.0)                                  |                 |
| Lip                                                            | 2 (2.9)                                     | 1 (6.3)                                  |                 |
| Hard palate                                                    | 1 (1.4)                                     | 0 (0.0)                                  |                 |
| TNM stage (III vs IVA vs IVB)                                  | 4 (5.8) : 50 (72.5) : 15 (21.7)             | 2 (12.5) : 8 (50.0) : 6 (37.5)           | 0.213           |
| T status (T0-2 vs T3-4)                                        | 19 (27.5) : 50 (72.5)                       | 2 (12.5) : 14 (87.5)                     | 0.919           |
| N status (N0-1 vs N2-3)                                        | 30 (43.4) : 39 (46.6)                       | 3 (31.2) : 13 (68.8)                     | 0.371           |
| ECOG performance status (0 : 1 : 2)                            | 2 (2.9) : 61 (88.4) : 6 (8.6)               | 1 (6.2) : 13 (81.3) : 2 (12.5)           | 0.448           |
| Histological grade (1 : 2 : 3)                                 | 8 (11.6) : 51 (73.9) : 10 (14.5)            | 2 (12.5) : 12 (75.0) : 2 (12.5)          | 0.976           |
| Smoking (no : yes)                                             | 6 (8.7) : 63 (91.3)                         | 0 (0.0) : 16 (100.0)                     | 0.221           |
| Alcohol (no : yes)                                             | 18 (26.1) : 51 (73.9)                       | 3 (18.8) : 13 (81.2)                     | 0.540           |
| Betel nut (no : yes)                                           | 16 (23.2) : 53 (76.8)                       | 8 (50.0) : 8 (50.0)                      | 0.032*          |
| HN-CCI (0 vs 1 vs 2 vs $\geq$ 3)                               | 29 (42.0) : 15 (21.7) : 6 (8.7) : 19 (27.5) | 4 (25.0) : 8 (50.0) : 3 (18.3) : 1 (6.3) | 0.049*          |
| Tracheostomy (no : yes)                                        | 23 (33.4) : 46 (66.6)                       | 9 (56.3) : 7 (43.8)                      | 0.088           |
| Adjuvant CCRT due to risk factor                               |                                             |                                          | 0.089           |
| One major (positive surgical margin or ENE)                    | 42 (60.9)                                   | 6 (37.5)                                 |                 |
| $\geq$ 3 Minors                                                | 27 (39.1)                                   | 10 (62.5)                                |                 |
| <b><i>Nutritional and inflammatory markers before CCRT</i></b> |                                             |                                          |                 |
| BW (kg)                                                        | 63.6 $\pm$ 12.6                             | 60.7 $\pm$ 10.5                          | 0.407           |
| BMI (kg/m <sup>2</sup> )                                       | 22.8 $\pm$ 4.3                              | 22.4 $\pm$ 3.5                           | 0.793           |
| BWL(kg)                                                        | 1.0 $\pm$ 6.3                               | 0.92 $\pm$ 11.7                          | 0.885           |
| Hb (mg/dL)                                                     | 11.7 $\pm$ 1.5                              | 11.6 $\pm$ 1.7                           | 0.884           |
| WBC (x10 <sup>3</sup> cells/mm <sup>3</sup> )                  | 7.3 $\pm$ 2.5                               | 7.2 $\pm$ 4.6                            | 0.979           |
| Platelet count (x10 <sup>3</sup> /mm <sup>3</sup> )            | 341.1 $\pm$ 148.4                           | 224.8 $\pm$ 82.2                         | 0.003*          |
| Albumin (g/dL)                                                 | 3.9 $\pm$ 0.5                               | 3.8 $\pm$ 0.6                            | 0.848           |
| CRP (mg/dL)                                                    | 9.3 $\pm$ 13.7                              | 13.2 $\pm$ 14.4                          | 0.670           |
| <b><i>PG-SGA (well vs moderate vs severe) before CCRT</i></b>  | 2 (2.9) : 32 (46.4) : 35 (50.7)             | 2 (12.5) : 10 (62.5) : 4 (25.0)          | 0.807           |

***Body composition parameters before CCRT***

|                           |             |             |        |
|---------------------------|-------------|-------------|--------|
| LBMI (kg/m <sup>2</sup> ) | 15.7 ± 1.6  | 16.3 ± 2.4  | 0.212  |
| TFMI (kg/m <sup>2</sup> ) | 6.1 ± 3.1   | 9.2 ± 3.2   | 0.001* |
| ASMI (kg/m <sup>2</sup> ) | 6.6 ± 1.0   | 6.7 ± 1.1   | 0.666  |
| Android (%)               | 29.7 ± 13.4 | 25.4 ± 10.4 | 0.239  |
| Gynoid (%)                | 25.7 ± 8.3  | 24.3 ± 8.2  | 0.514  |
| BMCI (kg/m <sup>2</sup> ) | 1.4 ± 0.1   | 1.4 ± 1.1   | 0.881  |

\*indicates a significant *P*-value < 0.05

The analytic methods of Table S3 are identical to those of Table 3

Abbreviations: CCRT, concurrent chemoradiotherapy; TNM, tumor node metastasis; ECOG, Eastern Collaboration Oncology Group; HN-CCI, head and neck Charlson Comorbidity Index; RT, radiotherapy; PG-SGA, patient-generated subjective global assessment; BMI, body mass index; BWL, body weight loss; Hb, hemoglobin; WBC, white cell count; TLC, total lymphocyte count; CRP, C-reactive protein

Independent *t* test was used for age, BMI, Hb, platelet count and Albumin. Mann-Whitney test was used for BWL, WBC, CRP and all body composition parameters
