# Supplementary material for: Comorbidity, Radiation Duration, and Pretreatment Body Muscle Mass Predict Early Treatment Failure in Taiwanese Patients with Locally Advanced Oral Cavity Squamous Cell Carcinoma after Completion of Adjuvant Concurrent Chemoradiotherapy
Source: MDPI journal article supplement (doi:10.3390/diagnostics11071203), 2021-07-02
Supplement: s1 [file s1]

**Table S2.** The characteristic between patients with low Factor 3 ( $\leq 0.67$ ) and high factor 3 ( $> 0.67$ ) early treatment failure in 69 oral cavity cancer patients following CCRT completion

| Variables, expressed as Numbers (%) or mean $\pm$ SD | Factor 3 level                        |                                     | P-value |
|------------------------------------------------------|---------------------------------------|-------------------------------------|---------|
|                                                      | $\leq 0.67$                           | $> 0.67$                            |         |
| <b>Patient number</b>                                | 52                                    | 17                                  |         |
| <b>Clinicopathologic</b>                             |                                       |                                     |         |
| Age (years)                                          | 53.6 $\pm$ 7.9                        | 51.8 $\pm$ 10.1                     | 0.454   |
| Tumor location                                       |                                       |                                     | 0.145   |
| Buccal mucosa                                        | 16 (30.8)                             | 4 (23.5)                            |         |
| Tongue                                               | 23 (44.2)                             | 5 (29.4)                            |         |
| Gingiva                                              | 6 (11.5)                              | 7 (41.2)                            |         |
| Mouth floor                                          | 3 (5.8)                               | 0 (0.0)                             |         |
| Retromolar                                           | 2 (3.8)                               | 0 (0.0)                             |         |
| Lip                                                  | 1 (1.9)                               | 1 (5.9)                             |         |
| Hard palate                                          | 1 (1.9)                               | 0 (0.0)                             |         |
| TNM stage (III vs IVA vs IVB)                        | 2 (3.8) : 36 (69.2) : 14 (27.0)       | 2 (11.8) : 14 (82.3) : 1 (5.9)      | 0.117   |
| T status (T0-2 vs T3-4)                              | 5 (9.6) : 47 (90.4)                   | 3 (17.9) : 14 (82.4)                | 0.368   |
| N status (N0-1 vs N2-3)                              | 22 (42.3) : 30 (57.7)                 | 8 (47.1) : 9 (52.9)                 | 0.732   |
| ECOG performance status (0 : 1 : 2)                  | 1 (19.1) : 45 (86.5) : 6 (11.6)       | 1 (5.9) : 16 (94.1) : 0 (0.0)       | 0.434   |
| Histological grade (1 : 2 : 3)                       | 8 (15.4) : 36 (69.2) : 8 (15.4)       | 0 (0.0) : 15 (88.2) : 2 (11.8)      | 0.187   |
| Smoking (no : yes)                                   | 3 (5.8) : 49 (94.2)                   | 3 (17.6) : 14 (82.4)                | 0.131   |
| Alcohol (no : yes)                                   | 15 (28.8) : 37 (71.2)                 | 3 (17.6) : 14 (82.4)                | 0.361   |
| Betel nut (no : yes)                                 | 11 (21.2) : 41 (78.8)                 | 5 (29.4) : 12 (70.6)                | 0.484   |
| HN-CCI (0 vs 1 vs 2 vs $\geq 3$ )                    | 23 (44.2):10 (19.2):3 (5.8):16 (30.8) | 6 (35.3):5 (29.4):3 (17.6):3 (17.6) | 0.353   |
| Tracheostomy (no : yes)                              | 15 (28.8) : 37 (71.2)                 | 8 (47.1) : 9 (52.9)                 | 0.167   |
| Adjuvant CCRT due to risk factor                     |                                       |                                     | 0.179   |
| One major (positive surgical margin or ENE)          | 34 (65.4)                             | 8 (47.1)                            |         |
| $\geq 3$ Minors                                      | 18 (34.6)                             | 9 (52.9)                            |         |
| <b>CCRT</b>                                          |                                       |                                     |         |
| RT dose (Gy)                                         | 64.6 $\pm$ 3.8                        | 63.5 $\pm$ 3.8                      | 0.339   |
| RT duration (days)                                   | 48.8 $\pm$ 5.2                        | 45.8 $\pm$ 2.8                      | 0.031*  |
| Cisplatin dose (mg/m <sup>2</sup> )                  | 239.1 $\pm$ 20.7                      | 236.4 $\pm$ 20.3                    | 0.646   |
| <b>CCRT-induced grade 3/4 toxicity</b>               |                                       |                                     |         |
| Dermatitis                                           | 3 (5.8)                               | 0 (0.0)                             | 0.311   |
| Pharyngitis                                          | 5 (9.6)                               | 0 (0.0)                             | 0.194   |
| Mucositis                                            | 13 (25.6)                             | 3 (17.6)                            | 0.680   |
| Infection                                            | 10 (19.2)                             | 0 (0.0)                             | 0.043*  |

|                                                            |                                         |                                       |              |
|------------------------------------------------------------|-----------------------------------------|---------------------------------------|--------------|
| Emesis                                                     | 6 (11.5)                                | 0 (0.0)                               | 0.194        |
| Anemia (%)                                                 | 3 (5.8)                                 | 2 (11.8)                              | 0.408        |
| Neutropenia (%)                                            | 21 (40.4)                               | 2 (11.8)                              | 0.022*       |
| Thrombocytopenia (%)                                       | 2 (3.8)                                 | 2 (11.8)                              | 0.225        |
| <b>Mean daily calorie intake during CCRT (kcal/kg/day)</b> | <b>30.0 ± 8.9</b>                       | <b>27.5 ± 10.6</b>                    | <b>0.221</b> |
| <b>Nutritional and inflammatory markers before CCRT</b>    |                                         |                                       |              |
| BMI (kg/m <sup>2</sup> )                                   | 21.5 ± 3.5                              | 26.4 ± 4.5                            | <0.001*      |
| BWL(kg)                                                    | −5.8 ± 8.6                              | 15.1 ± 11.7                           | <0.001*      |
| Hb (mg/dL)                                                 | 11.7 ± 1.5                              | 11.8 ± 1.4                            | 0.603        |
| WBC (x10 <sup>3</sup> cells/mm <sup>3</sup> )              | 7.3 ± 2.7                               | 7.1 ± 1.9                             | 0.820        |
| Platelet count (x10 <sup>3</sup> /mm <sup>3</sup> )        | 347.5 ± 157.2                           | 321.5 ± 119.0                         | 0.535        |
| Albumin (g/dL)                                             | 3.8 ± 0.5                               | 4.0 ± 0.4                             | 0.117        |
| CRP (mg/dL)                                                | 12.4 ± 8.4                              | 8.3 ± 9.8                             | 0.037*       |
| <b>PG-SGA (well vs moderate vs severe) before CCRT</b>     | <b>8 (15.4) : 29 (55.8) : 15 (28.8)</b> | <b>5 (29.4) : 9 (52.9) : 3 (17.6)</b> | <b>0.373</b> |
| <b>Body composition parameters</b>                         |                                         |                                       |              |
| Factor 1                                                   | −0.032 ± 0.98                           | 0.099 ± 1.07                          | 0.638        |
| Factor 2                                                   | −0.017 ± 0.98                           | 0.053 ± 1.02                          | 0.803        |
| Factor 3                                                   | −0.403 ± 0.77                           | 1.233 ± 0.42                          | <0.001*      |
| Factor 4                                                   | 0.044 ± 1.07                            | −0.136 ± 0.75                         | 0.522        |
| Factor 5                                                   | −0.042 ± 1.03                           | 0.127 ± 0.93                          | 0.549        |

\*indicates a significant *P*-value < 0.05

The analytic methods of Table S2 are identical to those of Table 3

Abbreviations: CCRT, concurrent chemoradiotherapy; TNM, tumor node metastasis; ECOG, Eastern Collaboration Oncology Group; HN-CCI, head and neck Charlson Comorbidity Index; RT, radiotherapy; PG-SGA, patient-generated subjective global assessment; BMI, body mass index; BWL, body weight loss; Hb, hemoglobin; WBC, white cell count; TLC, total lymphocyte count; CRP, C-reactive protein

Independent *t* test was used for age, BMI, Hb, platelet count and Albumin. Mann-Whitney test was used for BWL, WBC, CRP and all body composition parameters
